1 **Psychophysiological Interactions in a Visual Checkerboard Task: Reproducibility, Reliability, and**  
2 **the Effects of Deconvolution**

3

4 Xin Di and Bharat B. Biswal\*

5

6 Department of Biomedical Engineering, New Jersey Institute of Technology, Newark, NJ, 07102, USA.

7

8 \*Corresponding author:

9 Bharat B. Biswal, PhD

10 607 Fenster Hall, University Height

11 Newark, NJ, 07102, USA

12 bbiswal@yahoo.com

13

14 Running head: Reproducibility and reliability of PPI

15

16 **Abstract:**

17 Psychophysiological interaction (PPI) is a regression based method to study task modulated brain  
18 connectivity. Despite its popularity in functional MRI (fMRI) studies, its reliability and reproducibility  
19 have not been evaluated. We investigated reproducibility and reliability of PPI effects during a simple  
20 visual task, and examined the effect of deconvolution on the PPI results. A large open-access dataset was  
21 analyzed ( $n = 138$ ), where a visual task was scanned twice with repetition times (TRs) of 645 ms and  
22 1400 ms, respectively. We first replicated our previous results by using the left and right middle occipital  
23 gyrus as seeds. Then ROI-wise (regions of interest) analysis was performed among twenty visual-related  
24 thalamic and cortical regions, and negative PPI effects were found between many ROIs with the posterior  
25 fusiform gyrus as a hub region. Both the seed-based and ROI-wise results were similar between the two  
26 runs and between the two PPI methods with and without deconvolution. The non-deconvolution method  
27 and the short TR run in general had larger effect sizes and greater extents. However, the deconvolution  
28 method performed worse in the 645 ms TR run than the 1400 ms TR run in the voxel-wise analysis.  
29 Given the general similar results between the two methods and the uncertainty of deconvolution, we  
30 suggest that deconvolution may be not necessary for PPI analysis on block-designed data. Lastly,  
31 intraclass correlations between the two runs were much lower for the PPI effects than the activation main  
32 effects, which raise cautions on performing inter-subject correlations and group comparisons on PPI  
33 effects.

34

35 **Keywords:** Reproducibility, reliability, test-retest, psychophysiological interaction, deconvolution.

36

37

## 38 **1. Introduction**

39 Psychophysiological interaction (PPI) is a widely used method to study task related brain functional  
40 connectivity changes (Friston et al., 1997). It employed simple regression-based method to model task  
41 modulated connectivity effects, thus enabling whole brain exploratory analysis. Therefore, even though  
42 there are more sophisticated methods available, e.g. dynamic causal modeling (Friston et al., 2003), PPI is  
43 still a valuable method for fMRI data, given that our knowledge on large-scale task related connectivity is  
44 still quite limited. Several modifications of the PPI method have been made after it was proposed,  
45 including adding a deconvolution step to deal with the asynchrony between task design and fMRI  
46 hemodynamic response (Gitelman et al., 2003) and introducing a generalized framework to model more  
47 than two experimental conditions (McLaren et al., 2012).

48 A PPI effect is defined as an interaction between the time series of a brain region (physiological  
49 variable) and a (or more) task design variable (psychological variable). Noises of both the physiological  
50 and psychological variables go into the interaction term, so that the interaction effect is much noisier than  
51 the main effects of task free connectivity (physiological main effect) and task activation (psychological  
52 main effect). This makes PPI analysis having lower statistical power than simple connectivity and  
53 conventional activation analysis. Since PPI analysis has been increasingly used to study group  
54 differences and inter-subjects variability, it is important to evaluate the reproducibility and reliability of  
55 the PPI methods (Dubois and Adolphs, 2016; Vul et al., 2009). Voxel-based meta-analysis has been used  
56 to examine consistency of PPI results across studies (Di et al., 2017a). However, because the tasks used  
57 in different studies varied greatly, the motivation of a meta-analysis on PPI was rather to identify different  
58 connectivity that were modulated by different tasks, than to simply identify consistent connectivity cross  
59 studies with different tasks (Di et al., 2017a). Nevertheless, the reliability of PPI effect has not been  
60 directly examined.

61 One critical step for the PPI method is to properly deal with the asynchrony between task design  
62 and observed blood-oxygen-level dependent (BOLD) signals. An earlier solution is to convolve the

63 psychological variable with hemodynamic response function (HRF). Then the PPI term  $x_{PPI}^1$  could be  
64 expressed as:

$$65 \quad x_{PPI}^1 = x_{Physio} \cdot (z_{Psych} * hrf) \quad (1)$$

66 where  $x_{Physio}$  represents the physiological variable,  $z_{Psych}$  represents the psychological design variable, and  
67 \* represents convolution operator. However, this calculation is not appropriate if the interaction  
68 happened faster than the slow hemodynamic response. Therefore, a deconvolution procedure is required  
69 (Gitelman et al., 2003) to find a variable  $z_{Physio}$  that:

$$70 \quad x_{Physio} = z_{Physio} * hrf \quad (2)$$

71 If this could be achieved, then the interaction could be calculated at the neuronal level and then convolve  
72 with HRF:

$$73 \quad x_{PPI}^2 = (z_{Psych} \cdot z_{Physio}) * hrf \quad (3)$$

74 We can also put equation (2) to equation (1), so that:

$$75 \quad x_{PPI}^1 = (z_{Psych} * hrf) \cdot (z_{Physio} * hrf) \quad (4)$$

76 Mathematically,  $x_{PPI}^1$  and  $x_{PPI}^2$  are not equivalent. Therefore, deconvolution seems necessary.  
77 Effective deconvolution depends on assumptions such as known HRF and noise characteristics in the  
78 BOLD signals (O'Reilly et al., 2012; Roebroeck et al., 2011). Unfortunately, there are substantial amount  
79 of variability in HRF both across brain regions and across subjects (Handwerker et al., 2004). On the  
80 other hand, if a task design is slower than the hemodynamic response, e.g. a blocked design, the PPI terms  
81 calculated from the above mentioned two methods could be very similar. We have demonstrated that the  
82 PPI results of a block-designed visual task are spatially corresponding very well between the  
83 deconvolution and non-deconvolution PPI methods (Di et al., 2017b). Whether to perform deconvolution  
84 then needs to compromise between the deviation between the PPI terms calculated in different ways and  
85 the uncertainty of deconvolution (Di et al., 2017b). Therefore, it might be better to not perform  
86 deconvolution for an block-designed task, which is actually recommended by FSL (FMRIB Software

87 Library) (Jenkinson et al., 2012; O'Reilly et al., 2012). For event-related designed task, however,  
88 deconvolution may be still necessary, because the PPI terms calculated from the deconvolution and non-  
89 deconvolution methods may be dramatically different.

90 We recently demonstrated negative PPI effects (reduced connectivity) between the middle  
91 occipital gyrus to the fusiform gyrus and supplementary motor areas in a simple block-designed  
92 checkerboard task compared with a fixation baseline (Di et al., 2017b). Here, we further analyzed a  
93 larger sample of checkerboard data ( $n = 138$ ) of two separate runs with two repetition times (TR: 645 ms  
94 and 1400 ms) (Nooner et al., 2012). The aims of the current study are to first evaluate reproducibility and  
95 reliability of PPI effects in the checkerboard task. Additionally, we investigated the impact of PPI  
96 calculation methods on the PPI results and their reproducibility and reliability. We operationally defined  
97 reproducibility as whether previously reported clusters could be observed in the current analysis, and  
98 whether the clusters reported in one run could be observed in the other run. Quantitatively, we utilized  
99 Dice coefficient to quantify overlaps of voxels on thresholded maps (Rombouts et al., 1998; Taylor et al.,  
100 2012). Next, we used intraclass correlation (ICC) to quantify test-retest reliability. Because the short TR  
101 run has about twice the number of time points as the long TR one, we predict that statistical results would  
102 be better for the short TR run compared with the long TR run. In addition, shorter sampling rate may  
103 provide more accurate estimate of hemodynamic response, therefore deconvolution PPI method should  
104 work better for the short TR than the long TR runs.

105

## 106 **2. Methods**

### 107 **2.1. Simulations on the correlations between PPI terms**

108 The hemodynamic response is a slow response compared with neuronal events, which can be understood  
109 as a low-pass filter. Intuitively, if a task design is slow enough, e.g. a blocked design, the convolution  
110 with the HRF may not affect PPI calculations much. To directly demonstrate this relationship between  
111 design alternating length and the effect of convolution on PPI calculation, we firstly performed a

112 simulation. In this simulation, we defined a simple block-designed task with equal on and off periods  
113 with different cycle lengths (from 8 s to 80 s), and a simple event-related design with fixed inter trial  
114 interval of 12 s (Figure 1A). We used a typical sampling rate of 2 s, so that the event-related design could  
115 be expressed as alterations of one time bin (2 s) of a trial and 5 time bins (10 s) of the baseline condition  
116 (The first column in Figure 1A). The remaining columns in Figure 1A show block designs with different  
117 frequencies of repetition. For example, 80 secs cycle means 40-s on and 40-s off of the task condition  
118 related to the baseline. We then simulated the physiological variable of neuronal activities as a Gaussian  
119 variable for 1,000 times. For each design and simulated “neuronal” physiological variable, we calculated  
120 PPI terms using two ways: 1) each variable convolved with the canonical HRF and then the two  
121 convolved variables were multiplied to form a PPI term (corresponding to  $x_{PPI}^1$  in equation 4); 2) the two  
122 variables were multiplied and then convolved with the canonical HRF (corresponding to  $x_{PPI}^2$  in equation  
123 3). We then calculated the correlations of the PPI terms calculated from the two methods. The code for  
124 this simulation can be found at: [https://github.com/dixy0/PPI\\_correlation\\_demo](https://github.com/dixy0/PPI_correlation_demo).

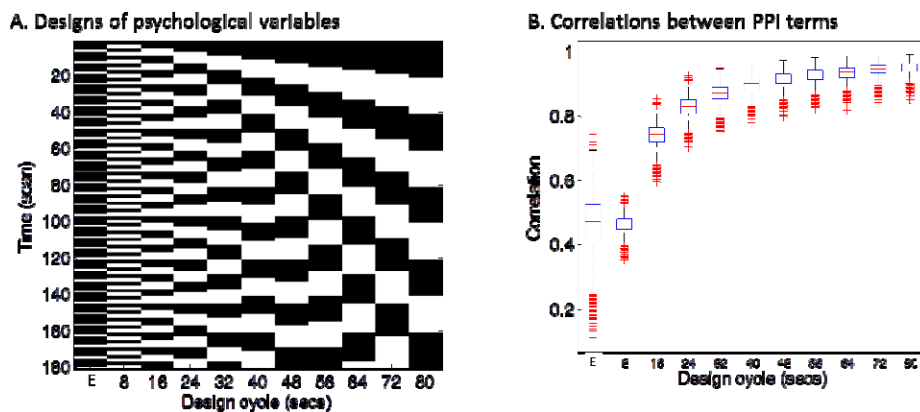

125  
126 **Figure 1** Simulations of the correlations between PPI terms calculated from deconvolution and non-  
127 deconvolution methods. Panel A illustrates different task designs that were used for the simulation. Each  
128 column represents a task design. E in the x axis represents the event-related design, with 1 time bin (2 s)  
129 of trial condition and 5 time bins (10 s) of baseline condition. The remaining columns show block  
130 designs with different frequencies of repetition. For example, 80 secs cycle means 40-s on and 40-s off of

131 the task condition related to the baseline. Physiological variables at the neuronal level were generated  
132 using Gaussian random variables for 1,000 times. Penal B shows boxplots of correlations across the  
133 1,000 simulations between PPI terms calculated from two methods: 1) the two simulated variables were  
134 convolved with the HRF and then multiplied to form the PPI term; 2) the two simulated variables were  
135 multiplied and then convolved with the HRF.

136

## 137 **2.2. fMRI data and task design**

138 We used the checkerboard fMRI data with TRs of 645 ms and 1400 ms from the release 1 of Enhanced  
139 Nathan Kline Institute - Rockland Sample ([http://fcon\\_1000.projects.nitrc.org/indi/enhanced/](http://fcon_1000.projects.nitrc.org/indi/enhanced/)). 146  
140 subjects' data with age equal or larger than 20 years old were included for analysis. Six subjects' data  
141 were discarded due to large head motion during fMRI scanning in any of the two scans (maximum frame-  
142 wise displacement (FD) (Di and Biswal, 2015) greater than 1.5 mm or 1.5°). One subject's data were  
143 deleted because of poor coverage of the lower occipital lobe, and another subject's data were deleted  
144 because of failure of coregistration and normalization. The effective number of subjects was 138 (89  
145 females, 45 males, 1 unidentified). The mean age of the sample was 47.8 years (20 to 83 years).

146 The checkerboard task consisted of 20 s fixation block and 20 s flickering checkerboard block  
147 repeated three times. A blank screen was presented after the third checkerboard block until fMRI scan  
148 was complete. The task was scanned for two separate runs with two TRs: 645 ms and 1400 ms,  
149 respectively. For the 645 ms run, 239 or 240 fMRI images were scanned for each subject. The following  
150 parameters were used: TR = 645 ms; TE = 30 ms; flip angle = 60 deg; voxel size = 3 x 3 x 3 mm<sup>3</sup>  
151 isotropic; number of slices = 40. For the 1400 ms run, 98 fMRI images were scanned for each subject.  
152 The following parameters were used: TR = 1400 ms; TE = 30 ms; flip angle = 65 deg; voxel size = 2 x 2  
153 x 2 mm<sup>3</sup> isotropic; number of slices = 64. Anatomical T1 images were scanned using MPRAGE  
154 (magnetization-prepared rapid acquisition with gradient echo) sequence with the following parameters:

155 TR = 1900 ms; TE = 2.52 ms; flip angle = 9 °; voxel size = 1 x 1 x 1 mm<sup>3</sup> isotropic. More information of  
156 the data can be found in Nooner et al. (Nooner et al., 2012).

## 157 **2.3. FMRI data analysis**

### 158 **2.3.1. FMRI data preprocessing**

159 Functional MRI data preprocessing and analysis were performed using SPM12 software  
160 (<http://www.fil.ion.ucl.ac.uk/spm/>) under MATLAB environment (<http://www.mathworks.com/>). For the  
161 645 ms run, the first 14 images (9 s) were discarded from analysis, resulting in 225 images for each  
162 subject. For the 1400 TR run, the first five images (7 s) were discarded from analysis, resulting in 93  
163 images for each subject. The functional images were motion corrected, and coregistered to subject's  
164 anatomical images. The anatomical images were segmented, and the deformation field images were used  
165 to normalize the functional images into MNI space. The data from the two TR runs were both resliced  
166 and resampled at a spatial resolution of 3 x 3 x 3 mm<sup>3</sup>. Lastly, the functional images were smoothed  
167 using a 6 mm full width at half maximum (FWHM) Gaussian kernel.

### 168 **2.3.2. Activation analysis**

169 We first defined functional ROIs of the visual thalamus and lower visual area by performing general  
170 linear model (GLM) analysis on the checkerboard task. The checkerboard task was modeled as a box-car  
171 function, and was convolved with canonical hemodynamic response function (HRF) to form a predictor  
172 of BOLD responses. Two regressors of the first eigenvariate of BOLD signals in white matter and  
173 cerebrospinal fluid (CSF), and 24 regressors of Friston's autoregressive head motion model (Friston et al.,  
174 1996) were also added in the model as covariates. An implicit high-pass filter of 1/128 Hz was also  
175 implemented in the model. The GLM model was estimated for each voxel in the brain to identify regions  
176 that showed similar patterns of activations as the task design. The beta maps of task activation were used  
177 for group level analysis using a one sample t-test model. Statistical significant clusters were identified by  
178 using cluster level statistics based on random field theory. Clusters were first identified using a one-tailed  
179 t-test at  $p < 0.001$ , and cluster extent was determined using false discovery rate (FDR) at  $p < 0.05$ .



### 180 **2.3.3. Definition of regions of interest**

181 We performed two types of PPI analyses, voxel-wise analysis using seed regions that were activated by  
182 the checkerboard task and ROI-based analysis among visual thalamus and cortical visual areas  
183 independently defined from other toolbox. In the activation analysis of the current data, the posterior  
184 visual cortex and the posterior portion of the thalamus were robustly activated by the visual checkerboard  
185 stimulation in both TR runs. We therefore defined the left and right middle occipital gyrus (LMOG and  
186 RMOG) and the thalamus as regions of interest (ROIs) based on the activations. To define the ROIs with  
187 proper size, we increase the threshold to  $t > 16$  to define the LMOG and RMOG, and made an intersection  
188 between the two runs. The size of LMOG was 222 voxels, and the size of RMOG was 259 voxels.  
189 Thalamus was defined using a threshold of  $p < 0.001$ , with an intersection between the two runs. Because  
190 the visual thalamus is small, left and right ROIs were combined to form a single thalamus ROI (171  
191 voxels). Different thresholds were chosen to ensure that these ROIs are similar in size. The eigenvariate  
192 of a ROI was extracted with adjustment of effects of no interests (head motion, WM/CSF variables, and  
193 low frequency drifts).

194 We defined the visual thalamus as the regions that show functional associations with the lateral  
195 visual network in resting-state (Yuan et al., 2016). Cortical visual areas were defined by using  
196 probabilistic cytoarchitectonic maps. These areas include the OC1/OC2 (occipital cortex) (Amunts et al.,  
197 2000), ventral and dorsal OC3 and OC4 (Kujovic et al., 2013; Rottschy et al., 2007), OC5 (Malikovic et  
198 al., 2006), and FG1/FG2 (fusiform gyrus) (Caspers et al., 2013). For the probabilistic maps of these  
199 regions, we first performed a winner-takes-all algorithm to define unique regions of each area, and then  
200 split them into left and right regions. As a result, there are 20 ROIs (left and right thalamus, OC1, OC3,  
201 OC3d, OC3v, OC4d, OC4v, OC5, FG1, and FG2). The eigenvariate of a ROI was extracted with  
202 adjustment of effects of no interests (head motion, WM/CSF variables, and low frequency drifts).

### 203 **2.3.4. Psychophysiological interaction analysis**

204 PPI analysis was performed using SPM12 with updates 6685. PPI terms were calculated by using both  
205 deconvolution method and non-deconvolution method. For the deconvolution method, the time series of  
206 a seed region was deconvolved with the canonical HRF, multiplied with the centered psychological box-  
207 car function, and convolved back with the HRF to form a predicted PPI time series at hemodynamic  
208 response level. For the non-deconvolution method, the box-car function of psychological design was  
209 convolved with the HRF to form a psychological variable, and it was centered and multiplied with the raw  
210 seed time series. Figure 2 shows examples of PPI terms calculated from the two methods in the two TR  
211 runs.

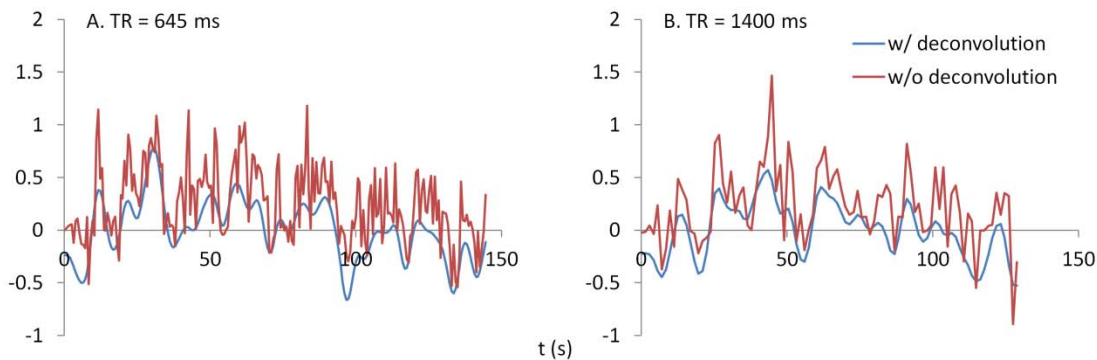

212  
213 **Figure 2** Examples of PPI terms calculated by the deconvolution and non-deconvolution methods for the  
214 two TR runs.

215  
216 For voxel-wise PPI analysis, separate GLMs were built for the LMOG, RMOG, and thalamus  
217 seeds, and for the two TR runs. The models included one regressor representing task activation, one  
218 regressor representing the seed time series, the PPI term, and covariates the same as the activation GLMs  
219 described above. Group-level one sample t-test was used on the corresponding PPI effects, to test where  
220 in the brain showed consistent PPI effects with a seed region. For both positive and negative contrasts, a  
221 one-tailed t-test of  $p < 0.001$  was first used to define clusters, and then a FDR cluster threshold of  $p < 0.05$   
222 was used to identify statistical significant clusters. For ROI-wise analysis, PPI GLM models were built  
223 for each of the 20 ROIs, and applied to all other ROIs as a dependent variable. The GLM model included

224 one psychological variable, one physiological variable, one PPI variable, and one constant term. The  
225 covariates were not included because they have already been regressed out from all ROI time series. PPI  
226 effects were calculated between each pair of ROIs, resulting in a 20 x 20 matrix of beta values for each  
227 subject. The matrices were symmetrized by averaging corresponding upper and lower diagonal elements  
228 (Di et al., 2017b), with a total of 190 (20 x 19 / 2) unique effects. Group-level one-sample t-test was  
229 performed on each element of the matrix. For both positive and negative contrasts, a one-tailed t-test of  $p$   
230  $< 0.001$  was used to identify significant PPI effects. This threshold was chosen to match with voxel-wise  
231 analysis. We also used FDR correction on the total of 190 effects. And the results are similar to what  
232 using a  $p < 0.001$  threshold. However, FDR depends on the distribution of all tested  $p$  values, making it  
233 difficult to compare between two runs. Therefore, we adopted  $p < 0.001$  to report ROI-based PPI results.

### 234 **2.3.5. Reproducibility and reliability**

235 We operationally define reproducibility as overlaps of supra-threshold clusters. Dice coefficient was used  
236 to quantify reproducibility (Rombouts et al., 1998). Two strategies were used to threshold the maps or  
237 matrix from the two TR runs. First, statistical  $t$  maps or  $t$  matrices from the two TR runs were  
238 thresholded using a common  $t$  value, ranging from 1.7 (approximately corresponds to  $p < 0.05$ ) to 7.  
239 However, it is possible that the effect sizes in the two TR runs are systematically different, so that using a  
240 same  $t$  value could generate very different numbers of supra-threshold voxels or elements in the two runs.  
241 Therefore, we also thresholded  $t$  maps or  $t$  matrices based on the percentile of  $t$  values within a map or  
242 matrix. This could ensure that the numbers of supra-threshold voxels or elements are the same between  
243 the two TR runs.

244 We operationally define reliability as test-retest reliability between the two TR runs, as quantified  
245 as ICC (Zuo et al., 2010a). Voxel-wise ICC maps or each ROI and ICC matrices across 20 ROIs were  
246 calculated between two TR runs for each PPI method. At each voxel or matrix element, ICC was  
247 calculated from a 138 (subject) by 2 (run) matrix by using a MATLAB function written by Zuo et al. (Zuo  
248 et al., 2010a). Because only voxels that have significant effects might show meaningful reliability, we

249 displayed histograms of ICCs within significant voxels or elements with reference to those in the whole  
250 brain. For task activations, the significant voxels were determined using intersection of the two TR runs  
251 each thresholded at  $p < 0.001$ . For PPI effects of each ROI, the significant voxels were determined using  
252 intersection of the two TR runs and two methods each thresholded at  $p < 0.01$ . This slightly liberal  
253 threshold was chosen to ensure enough number of voxels survived in the conjunction of the four scenarios.  
254 The whole brain mask was determined as all voxels in the brain, including WM and CSF.

255

### 256 **3. Results**

#### 257 **3.1. Simulations on the correlations between PPI terms**

258 The distributions of PPI correlations for each task design are shown in Figure 1B. For the block designs,  
259 the PPI correlations are a function of block cycle length. With longer design cycle, e.g. greater than 40 s  
260 (20-s on and 20-s off), the correlations of PPI terms could be higher than 0.9. Practically, most of the  
261 block-designed fMRI experiments have longer block cycles than 20-s on and 20-s off. If the block  
262 alterations become faster, the correlation between PPI terms decreased. And for the event-related design,  
263 the mean PPI correlations were below 0.5 and with large variations. This simulation demonstrates that if  
264 a neuronal activity time series is known, using convolved time series to calculate PPI term (i.e.  $x_{PPI}^1$ )  
265 could be very similar to what calculated by first multiplying the two variables and then convolving (i.e.  
266  $x_{PPI}^2$ ) for typical block designed experiments. In real fMRI data, the “neuronal” physiological variable is  
267 not known, and has to be estimated by using deconvolution. Considering the similarities of the PPI terms  
268 and the caveats of deconvolution, PPI calculations without deconvolution may be a better choice for block  
269 designed experiments. On the other hand, the PPI correlations in the event-related design are much  
270 smaller ( $r < 0.5$ , meaning less than 25% of shared variance). So that deconvolution is still a necessary  
271 step for PPI analysis in event-related designed experiments.

#### 272 **3.2. Activations of the checkerboard task**

273 Both TR runs showed highly significant activations in the visual cortex, as well as in the posterior portion  
274 of the thalamus (Figure 3A). The overlaps (Dice coefficients) of thresholded t maps between the two TR  
275 runs were as high as 0.7 (Figure 3B) at most of the shown t range percentile range. And Dice coefficients  
276 went down when only extremely activated voxels were thresholded. The visual cortex regions also  
277 showed high test-retest reliability (ICC greater than 0.7) (Figure 3C). However, the activations of the  
278 thalamus only showed small test-retest reliability around 0.2. The histograms of ICCs in the significant  
279 voxels and in the whole brain are shown on the right of Figure 3C.

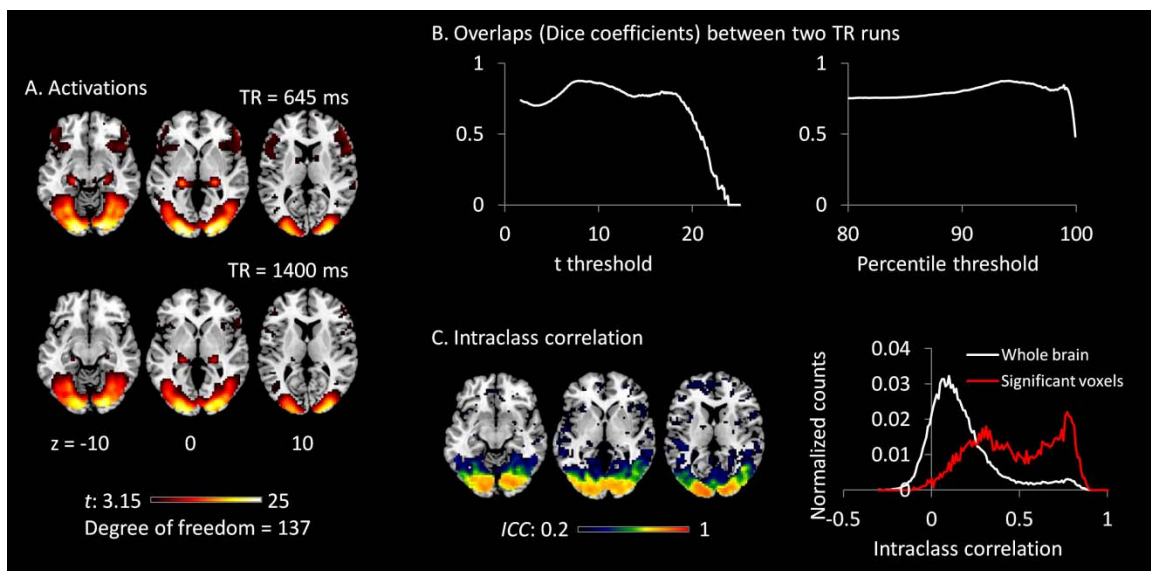

280  
281 **Figure 3** A) Activations (*t* maps) of visual checkerboard presentation for the 645 ms TR run (upper) and  
282 1400 ms TR run (lower). The threshold *t* value corresponds to one-tailed significance at  $p < 0.001$ . B)  
283 Overlaps (Dice coefficients) between the two TR runs using *t* threshold (left) and percentile threshold  
284 (right). C) Test-retest reliability map (intraclass correlations, ICC) of activations between the two runs is  
285 shown on the left, which were thresholded at  $ICC > 0.2$ . The histograms of ICC of activations between  
286 the two TR runs in significant voxels and whole brain are shown on the right. The significant voxels  
287 were determined using intersection of the two runs each thresholded at  $p < 0.001$ .

288

### 289 3.3. Psychophysiological interactions

290 The voxel-wise PPI analysis of the LMOG and RMOG seeds conveyed very similar patterns. The PPI  
291 effects of the LMOG seed for the two TRs and two methods are shown in Figure 4. We first observed  
292 that even though spatial extents of PPI effects varied across the two TR runs and two PPI methods, the  
293 negative PPI effects in previously reported regions, i.e. supplementary motor area and higher visual  
294 cortex, could be observed from all four scenarios. The deconvolution method in 645 ms TR run had the  
295 smallest spatial extent and statistical significance, while the non-deconvolution method in 645 ms TR run  
296 had the largest spatial extent and strongest statistical significance. Both methods in TR of 1400 ms  
297 showed similar spatial extent and significance levels. The last row in Figure 4 demonstrates the overlaps  
298 of negative effects in the four scenarios. Similar results were found in the analysis of the RMOG seed  
299 (Figure 5).

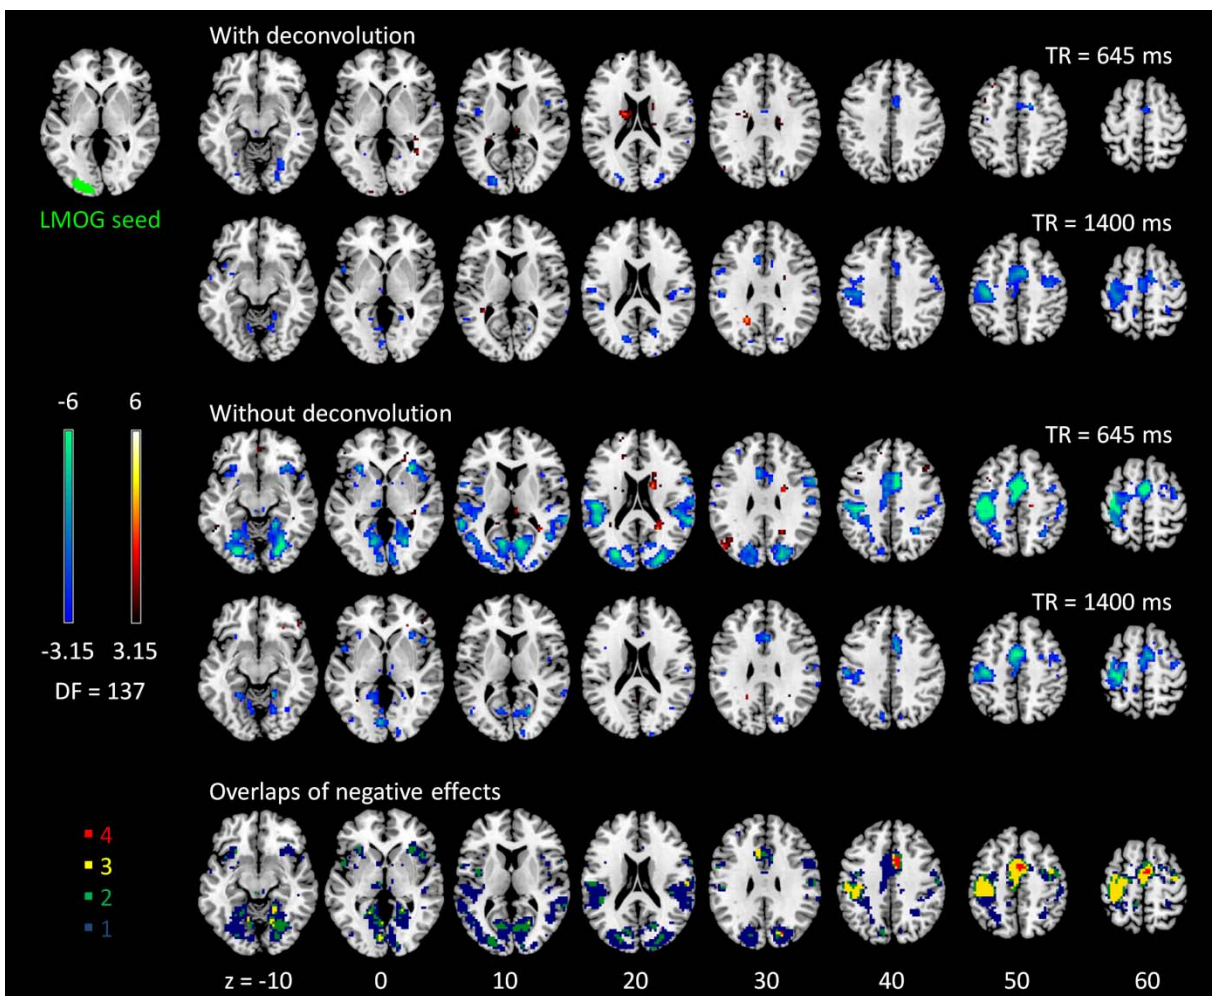

300

301 **Figure 4** Psychophysiological interaction (PPI) results for the left middle occipital gyrus (LMOG) seed  
302 during checkerboard presentation in the two TR (repetition time) runs of 645 ms and TR 1400 ms. The  
303 resulting clusters were thresholded at  $p < 0.001$  (approximated  $t = 3.15$ ), with DF (degree of freedom) of  
304 137. The last row illustrates the number of overlapped negative PPI results in the four scenarios.  
305 Numbers on the bottom represent z coordinates in MNI (Montreal Neurology Institute) space.  
306

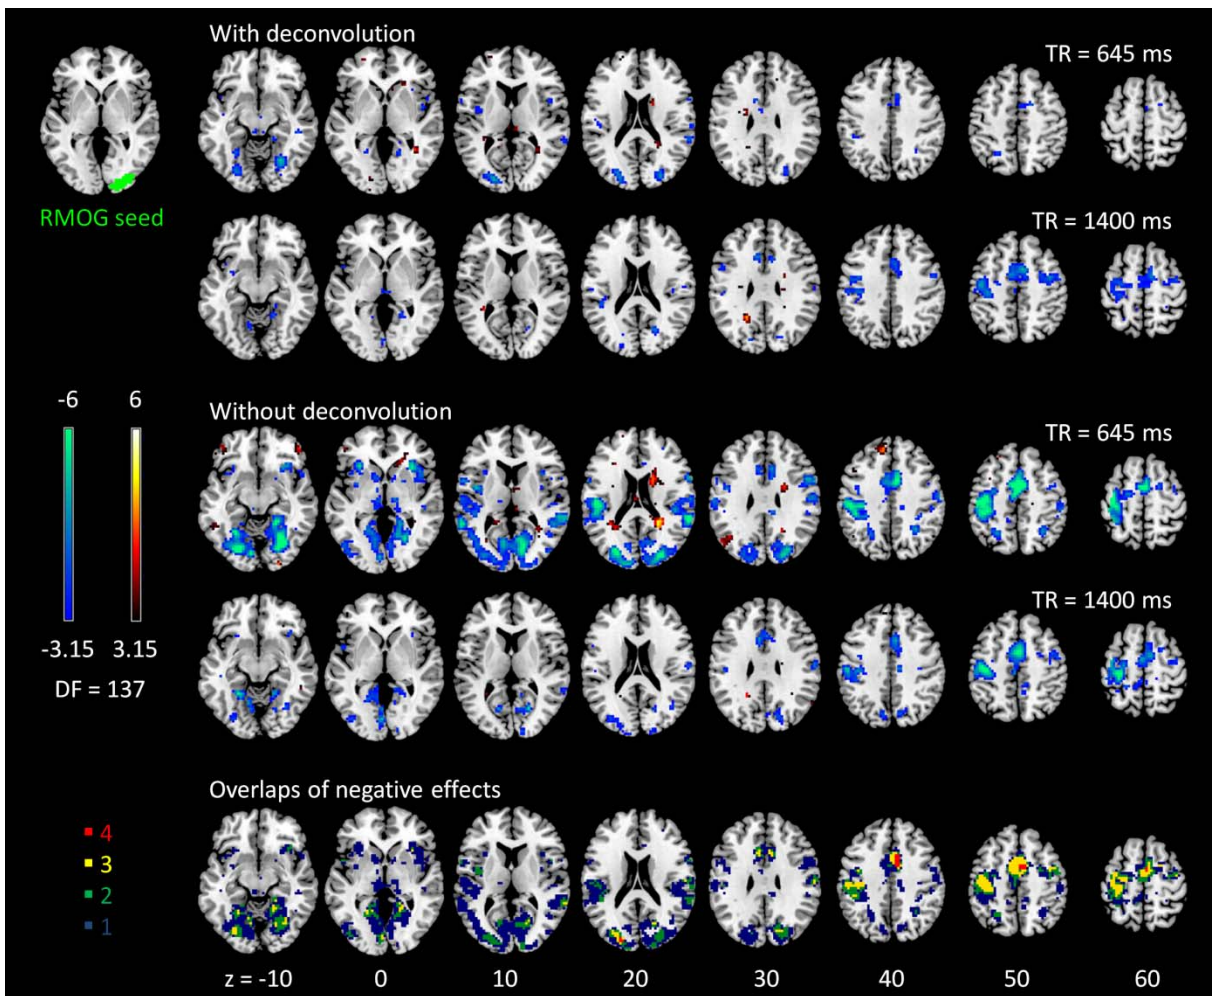

308 **Figure 5** Psychophysiological interaction (PPI) results for the right middle occipital gyrus (RMOG) seed  
309 during checkerboard presentation in the two TR (repetition time) runs of 645 ms and TR 1400 ms. The  
310 resulting clusters were thresholded at  $p < 0.001$  (approximated  $t = 3.15$ ), with DF (degree of freedom) of

311 137. The last row illustrates the number of overlapped negative PPI results in the four scenarios.

312 Numbers on the bottom represent z coordinates in MNI (Montreal Neurology Institute) space.

313

314 The voxel-wise PPI analysis of the thalamus seed only showed significant effects in the 645 TR

315 run, but with different brain regions with opposite effects (Figure 6). With deconvolution method, the

316 thalamus seed showed significant positive PPI effects with middle cingulate gyrus, anterior portion of the

317 thalamus, bilateral anterior insula, basal ganglia, and right fursiform gyrus. Whereas with non-

318 deconvolution method, the thalamus seed showed significant negative PPI effects with the bilateral

319 occipital pole regions. There were no consistent results between two TR runs and two methods.

320 Therefore subsequent analysis was only performed on the LMOG and RMOG seeds.

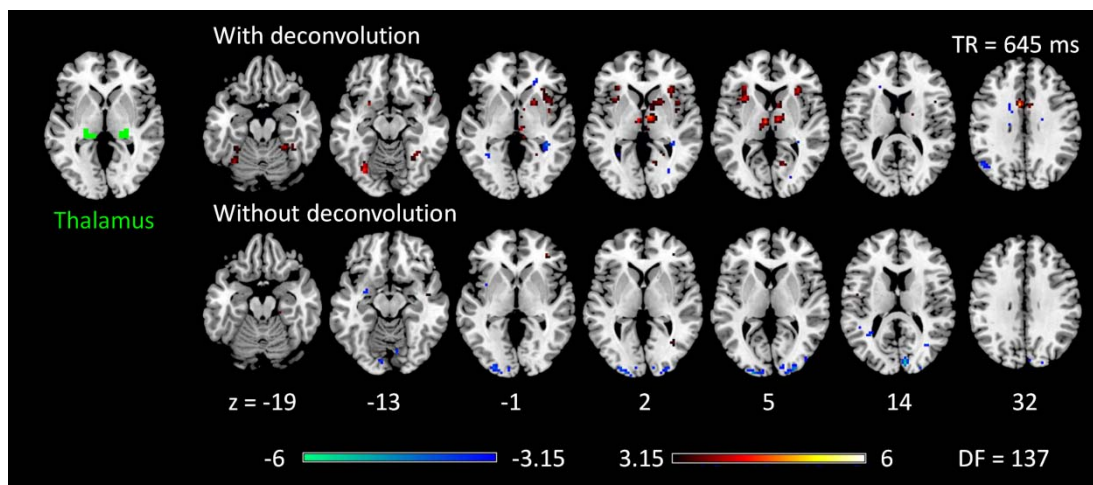

322 **Figure 6** Psychophysiological interaction (PPI) results for the thalamus seed during checkerboard

323 presentation in the TR (repetition time) run of 645 ms. There is no significant PPI effects of the thalamus

324 seed in TR run of 1400 ms. The resulting clusters were thresholded at  $p < 0.001$  (approximated  $t = 3.15$ ),

325 with DF (degree of freedom) of 137. Numbers on the bottom represent z coordinates in MNI (Montreal

326 Neurology Institute) space.

327

328 We next performed ROI-based PPI analysis among 20 regions of visual thalamus and cortical

329 visual areas (Figure 7). The 645 ms TR run showed more significant PPI effects than the 1400 ms TR run.



330 And non-deconvolution method showed more significant PPI effects than the deconvolutio method. A  
331 prominent number of connectivity changes are between the bilateral FG1 regions and other lower level  
332 visual areas ranging from OC1, OC2, to OC4. We performed a conjunction analysis of PPI results across  
333 the four scenarios, and identified five connections with reduced connectivity in checkerboard than in  
334 fixation. The regions and connections are highlighted in Figure 8.

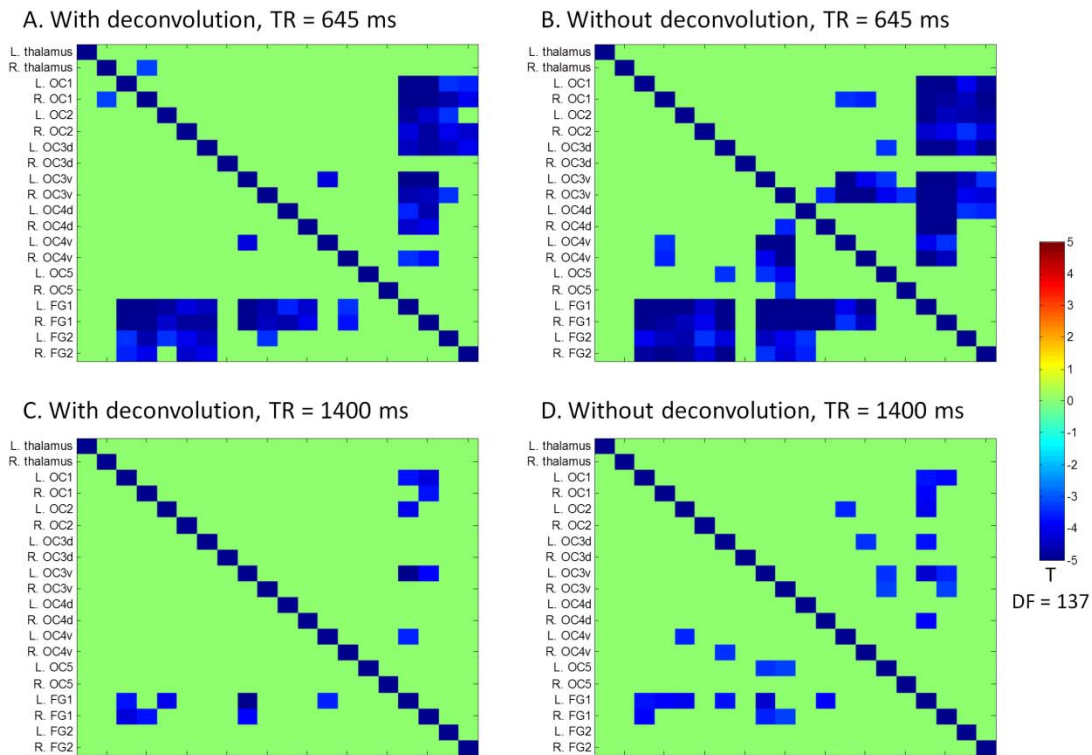

335  
336 **Figure 7** Matrices of psychophysiological interaction (PPI) results among the 20 regions of interest of  
337 visual thalamus and visual cortex for the two TR (repetition time) runs and two methods. The resulting  
338 clusters were thresholded at  $p < 0.001$ .

339

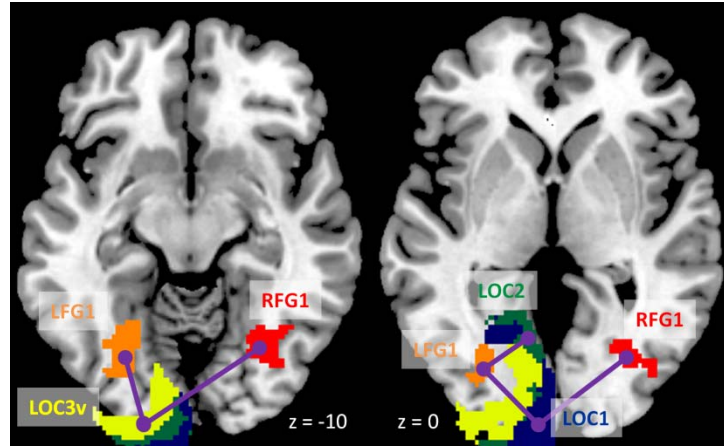

340

341 **Figure 8** Illustration of consistently reduced connectivity during checkerboard presentation compared  
342 with fixation in the ROI-based (region of interest) psychophysiological interaction (PPI) analysis in the  
343 two TR (repetition time) runs and two methods. Numbers on the bottom represent z coordinates in MNI  
344 (Montreal Neurology Institute) space.

345

### 346 3.4. Reproducibility of PPI effects

347 Since we observed similarities of spatial clusters and connectivity between the two TR runs, we next  
348 examined reproducibility of PPI effects by calculating Dice coefficients of thresholded statistical maps or  
349 PPI matrices between the two TR runs (Figure 9). For voxel-wise analysis of both LMOG and RMOG  
350 seeds, when varying t threshold, the non-deconvolution method showed higher level overlap compared  
351 with the deconvolution method (Figure 9A). When thresholding statistical maps with matched number of  
352 surviving voxels, a similar pattern could still be observed that the non-deconvolution method produced  
353 larger overlaps than the deconvolution method (Figure 9B). For the ROI-wise analysis, however, Dice  
354 coefficients were at similar level between two PPI methods at most t and percentile thresholds. But at  
355 very high t threshold or percentile thresholds, the deconvolution method seemed to produce larger  
356 overlaps (higher Dice coefficients) (Figure 9C and 9D).

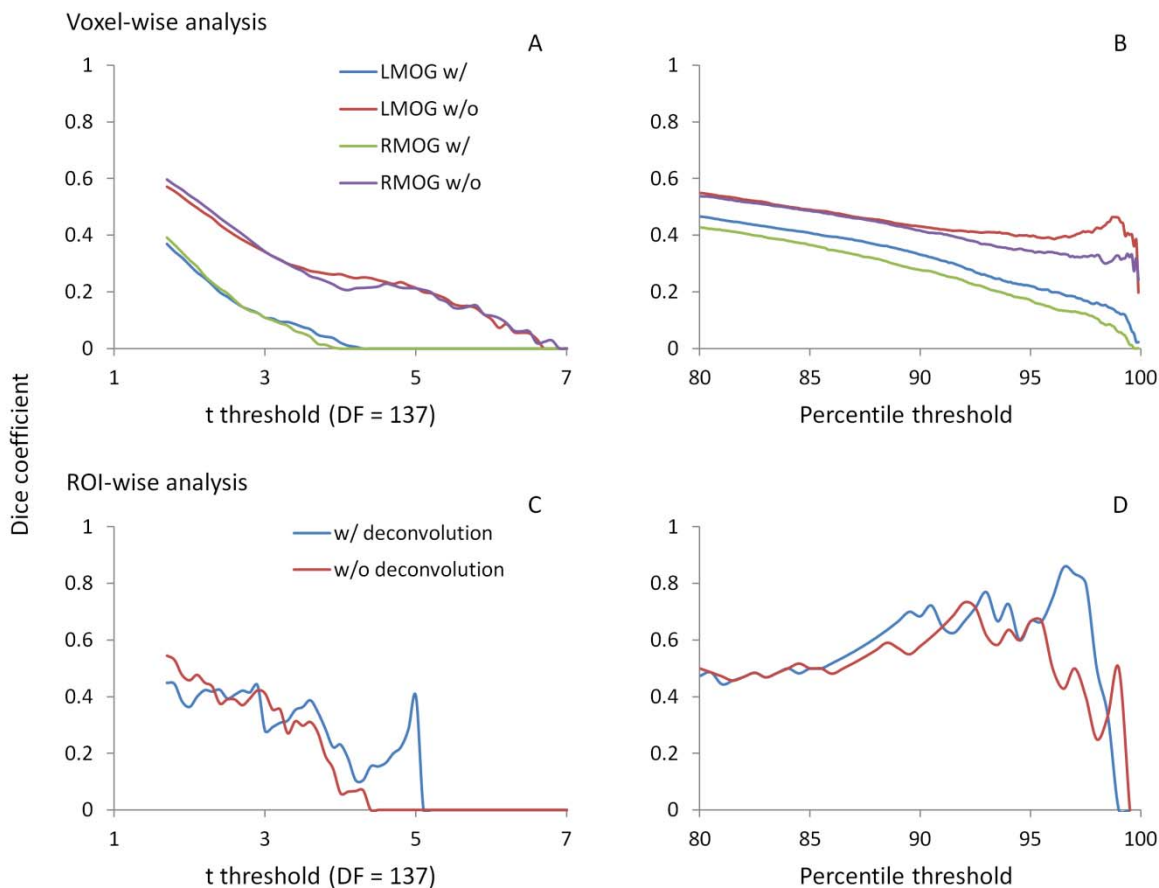

357

358 **Figure 9** Dice coefficients of thresholded negative PPI effects between the two TR runs as functions of t  
359 threshold (A) and percentile threshold (B) for the two seeds and two PPI methods. The lowest t used for  
360 calculating overlap is 1.7, which approximately corresponds to  $p < 0.05$ . The largest percentile is 80 to  
361 99.9 percentile, which is approximately corresponds to the largest proportions of voxels at  $p < 0.05$ .

362

### 363 3.5. Reliability of PPI effects

364 Lastly, we calculated ICC between the two TR runs to reflect reliability of PPI effects. The voxel-wise  
365 maps of ICC showed that there were typically low reliability in both methods and ROIs, even in the  
366 regions that showed consistent negative PPI effects (Supplementary Figure S1). We then plotted the  
367 histograms of ICCs in voxels from the whole brain (gray lines) and within regions that showed significant  
368 PPI effects (red lines) (Figure 10A through 10D). It turns out that the distributions of ICCs within

369 significant regions are only slightly different from the distributions of correlations in the whole brain,  
370 with means around 0.07. The distributions of ICCs were not different between deconvolution and non-  
371 deconvolution methods. Similar distributions of ICCs were also found for the ROI-wise analysis (Figure  
372 10E, 10F, and supplementary Figure S2). We found five PPI effects that were consistently significant in  
373 both TR runs and methods. And the ICCs for the five effects were also small and close to zero.

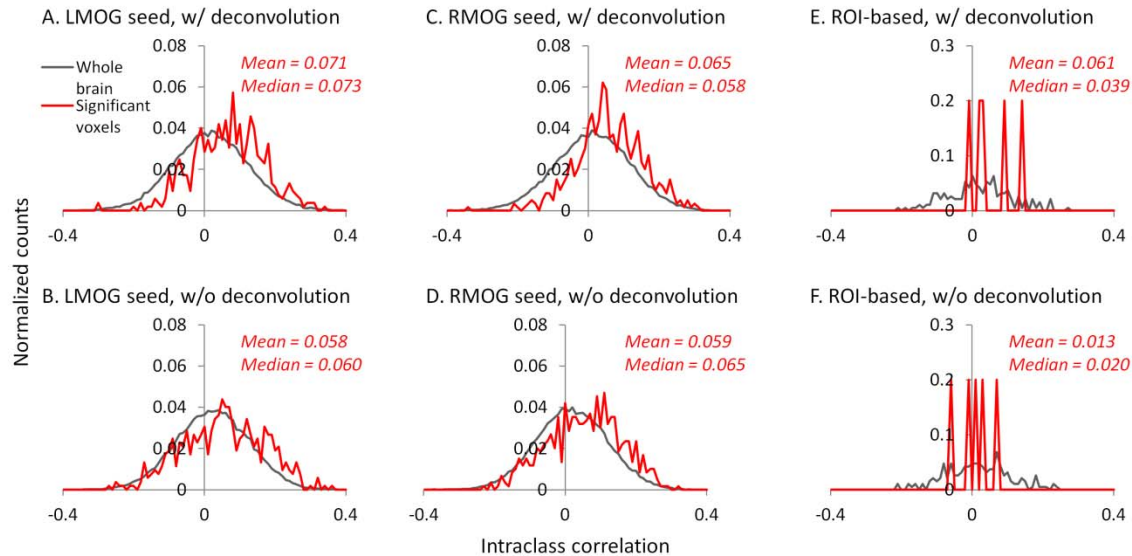

374  
375 **Figure 10** Histograms (normalized) of intraclass correlations of PPI effects between the two TR runs  
376 across the whole brain (gray lines) and in statistically significant voxels (red lines). The significant  
377 voxels were determined using intersection of the two runs and two methods each thresholded at  $p < 0.01$ .

378 Left and right masks were calculated separately.

379

### 380 3.6. Miscellaneous analysis

381 In order to have a better interpretation of the current results, we performed several exploratory analyses.  
382 First, we performed a conjunction analysis of the voxel-wise negative PPI effects across all the eight  
383 contrasts (2 PPI methods x 2 TR runs x seeds) using a threshold of  $p < 0.01$ , and identified 27 ROIs that  
384 showed common negative PPI effects. We then calculated averaged means, standard deviations, and  
385 coefficients of variations of the PPI effects in the 27 ROIs (Figure 11). The absolute means and standard

386 deviations of the PPI effects were smaller in the non-deconvolution method than those in the  
387 deconvolution method. When standardize the variations with respect to the mean (i.e. coefficient of  
388 variation), the reductions of coefficient of variation were more obvious in the 645 ms TR run than the  
389 1400 ms TR run. We note that the differences in mean effects may be related to different scaling of the  
390 PPI terms calculated from the two methods. Therefore, it is more appropriated to compare the coefficient  
391 of variation rather than standard deviation.

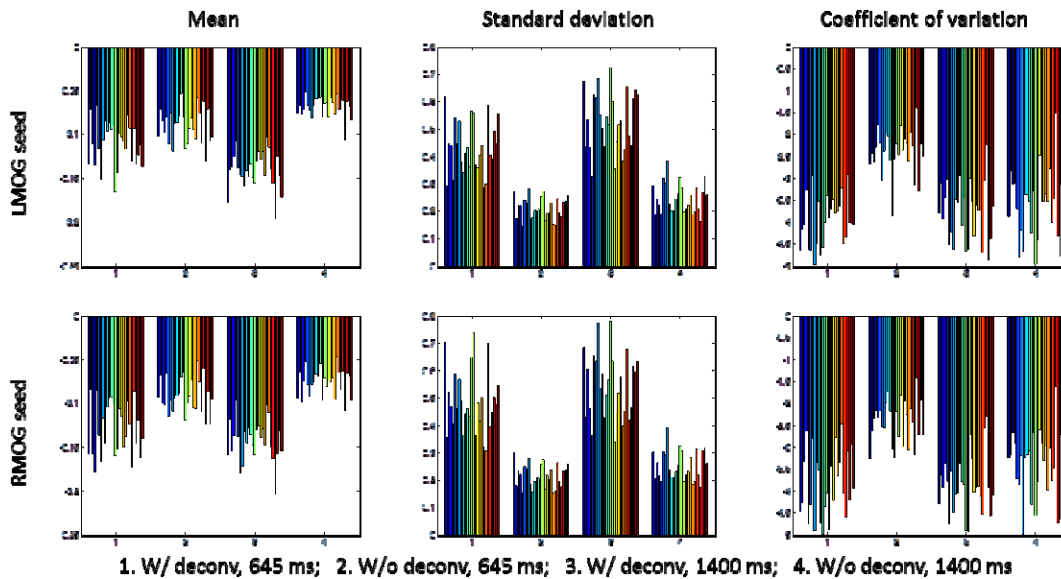

392  
393 **Figure 11** Mean, standard deviation, and coefficient of variation in the 27 regions of interest that showed  
394 significant negative PPI effects in the voxel-wise analysis of the left middle occipital gyrus (LMOG) (top  
395 row) and right middle occipital gyrus (RMOG) (bottom row) seeds. 1, 2, 3, and 4 of the x axes represent  
396 the four different scenarios with two PPI methods and two TR runs.

397  
398 To gain further insight to the cases of deconvolution failure, we calculated correlations of PPI  
399 terms between deconvolution and non-deconvolution methods for the LMOG and RMOG seeds (Figure  
400 12A). In both TR runs, the distributions of correlations centered approximately on 0.7, and there were  
401 outliers whose correlations were only 0.2 or 0.3. This is in contrast with the simulation results (Figure 1B,  
402 40 sec cycle), where the correlations were around 0.9.

403

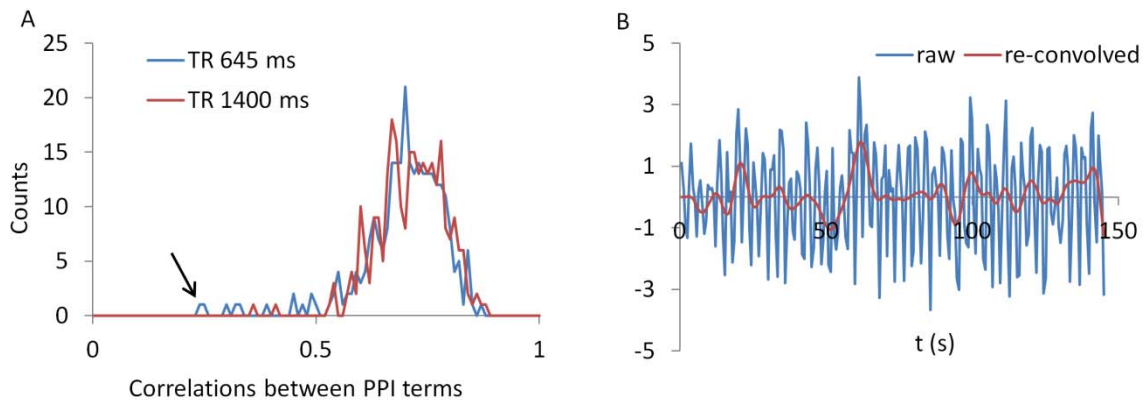

404

405 **Figure 12** A) Histograms of correlations between PPI terms with and without deconvolution across all  
406 subjects from both the LMOG and RMOG ROIs for the two TR runs. B) For the worst case as spotted by  
407 the black arrow in A), we show the raw time series and the time series with deconvolution and re-  
408 convolution with hemodynamic response function.

409

410 We identified the worst case in Figure 12A (black arrow indicated), and deconvolved and  
411 reconvolved it with HRF using SPM's method (Figure 12B). The raw and reconvolved signals look  
412 dramatically different, with the reconvolved signal resembling a smoothed version of the original signal.  
413 Smoothness is indeed the case for the SPM version of deconvolution (Gitelman et al., 2003), because it  
414 utilizes regularization to suppress high frequency components of cosine basis functions those were used to  
415 approximate the neuronal level physiological variable. To directly illustrate this point, we performed fast  
416 Fourier transformation on the time series of the RMOG for all the subjects on the raw, deconvolved, and  
417 reconvolved time series for the two TR runs (Figure 13). It could be seen that after deconvolution, high  
418 frequency components have been suppressed in both TR runs. Particularly, there is a black line that  
419 shows higher power between frequencies of 0.2 to 0.4 Hz in the raw data plot of 645 ms TR run, which  
420 coincides to be the outlier observed in Figure 12. The high frequency component was suppressed, so that  
421 the reconvolved signal looks smooth.

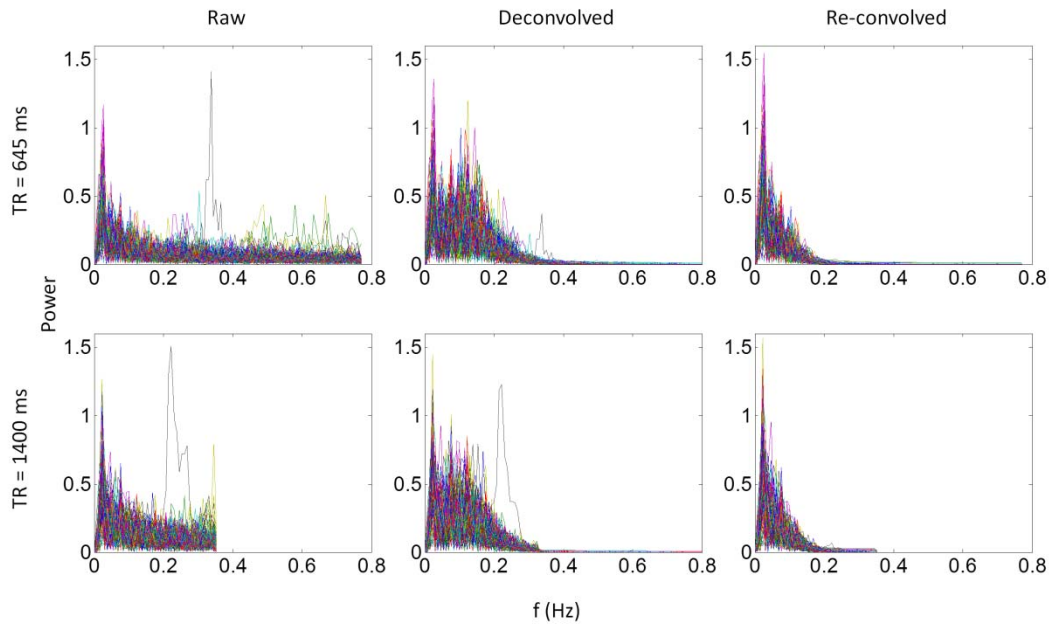

422

423 **Figure 13** Power spectrums of time series from the right middle occipital gyrus seed for each of the 138  
424 subjects for the 645 ms run (upper panels) and 1400 ms run (lower panels). Each line in a plot represents  
425 one subject. Left, middle, and right panels show the power spectrum of the raw, deconvolved, and re-  
426 convolved time series, respectively.

427

428

#### 429 **4. Discussion**

430 By analyzing two separate runs of visual checkerboard task from a large sample ( $n = 138$ ), the current  
431 study first replicated previously reported negative PPI effects between visual cortex and widespread brain  
432 regions, and then showed negative PPI effects among visual areas centered in the bilateral fusiform gyrus.  
433 By comparing results from two separate runs, we showed that group averaged effects were largely  
434 reproducible; however, the inter-subject reliabilities of the PPI effects were typically low. By comparing  
435 the deconvolution and non-deconvolution PPI methods, we demonstrated that the results by the two  
436 methods were in general very similar, but the non-deconvolution produced larger statistical effects and

437 spatial extents. The non-deconvolution method may reduce inter-subject variations and increase overlaps  
438 of results between the two runs in some circumstances compared with the deconvolution method.

#### 439 **4.1. Functional connectivity during checkerboard stimulation**

440 The voxel-wise analysis of the LMOG and RMOG seeds replicated our previous results which only  
441 analyzed a sub-set of 26 subjects (Di et al., 2017b, 2015). In our previous work (Di et al., 2017b) we  
442 could only identify significant PPI effects using the RMOG seed, while the current study demonstrated  
443 similar PPI effects from both the LMOG and RMOG seeds. Furthermore, we illustrated that the spatial  
444 extent of regions that showed reduced connectivity with the MOG seed could be much larger and  
445 extended to other brain regions such as the insula and bilateral sensorimotor cortex. This further suggests  
446 a higher extent of functional segregation between the visual cortex and other brain systems during such a  
447 simple visual stimulation task compared with the fixation. The current study also extended previous  
448 study by analyzing task modulated connectivity effects among cytoarchitecturally defined visual areas.  
449 Reduced functional connectivity was observed among many visual areas, with the bilateral FG1 as hub  
450 regions. FG1 is the most posterior portion of the fusiform gyrus, which just laid anterior to the occipital  
451 cortex (Caspers et al., 2013). It is thought a transition zone between lower retinotopic visual areas and  
452 higher category specific brain areas, and integrates information from different retinotopic visual areas to  
453 higher category specific brain areas (Caspers et al., 2014). Therefore, it is reasonable to see that the FG1  
454 showed reduced functional connectivity with many lower visual areas in the checkerboard condition,  
455 because the simple stimuli cannot form a meaningful percept of a specific category.

456 The thalamus is a critical subcortical structure in the brain, which not only relay sensory  
457 information to the cortex, but also thought to mediate corticocortical communications (Guillery and  
458 Sherman, 2002; Saalman and Kastner, 2011). The PPI analysis of the thalamus, however, did not show  
459 consistent effects in different TR runs, and different methods. It may be because that the visual thalamus is  
460 small in size compared with cortical visual areas, and the signals in the thalamus are not reliable enough.  
461 The current results do suggest some reduced connectivity between the visual thalamus to the primary



462 visual cortex, and increased connectivity between the visual thalamus to the anterior portion of the  
463 thalamus, basal ganglia, and insula. However, the results are weak and unreliable, especially considering  
464 that the current analysis had included 138 subjects.

#### 465 **4.2. Reproducibility and reliability of PPI effects**

466 To our knowledge, the current study is the first one to evaluate reproducibility and reliability on PPI  
467 effects. The current analysis did not only reproduce the results reported previously (Di et al., 2017b), but  
468 also examined the reproducibility between two runs. Although the two runs were scanned using different  
469 parameters, most importantly the temporal and spatial resolutions, the patterns of PPI effects turned out to  
470 be quite similar between the two runs. The run with 645 ms TR seemed to generate larger spatial extent  
471 in the voxel-wise analysis and more statistically significant results in the ROI-wise analysis. This is  
472 consistent with our prediction, because there are more time points in the 645 ms TR run than in the 1400  
473 ms TR run, which could yield higher statistical power. We do notice that in some scenarios, i.e. voxel-  
474 wise analysis with deconvolution, the PPI results in 645 ms TR run had smaller effect size and spatial  
475 extent, which might be due to failure of deconvolution.

476 On the other hand, the results indicated that inter-subject reliabilities are typically low (around  
477 0.07) no matter which PPI method was used. The low reliability should be compared with those of  
478 simple task activations, which showed reasonably high reliability regardless of the scan length. The  
479 reliability of PPI effects in the current analysis are also much lower than previous reported test-retest  
480 reliabilities on task activations (Plichta et al., 2012; Raemaekers et al., 2007) and resting-state functional  
481 connectivity (Guo et al., 2012; Zuo et al., 2010b). Of course the short scan lengths could be one factor  
482 that explains the low reliability of PPI effects. But it should be also emphasized that the reliability of  
483 higher order interaction effects (i.e. the PPI) should be much lower than the main effects of task  
484 activations and task-free functional connectivity. A scan length that has been shown to have reliable task  
485 activations may not be necessarily enough to yield reliable task modulated connectivity estimates. This  
486 factor should be taken into account when designing studies on task based connectivity.

### 487 **4.3. Deconvolution and PPI**

488 The PPI results using both the deconvolution and non-deconvolution methods are in general very similar.  
489 This is consistent with the simulation showing that the PPI term calculated from the convolution then  
490 multiplication method is very similar to the hypothetical PPI term with a known neural activity in a block-  
491 designed task. When comparing the differences of PPI results with these two methods, the non-  
492 deconvolution method seems to generate larger statistical effects and larger spatial extent or number of  
493 significant effects. The non-deconvolution method also increased the Dice coefficients of thresholded  
494 PPI maps between the two TR runs. However, the Dice coefficients of thresholded PPI matrices between  
495 the two TR runs are quite similar between the two PPI methods, and the deconvolution method may be  
496 even benefiting at higher thresholds. These results highlighted the uncertainty of deconvolution method  
497 in PPI analysis.

498 We have shown that the correlations of PPI terms between deconvolution and non-deconvolution  
499 methods may have outliers whose correlations were only 0.2 or 0.3 (Figure 12), which is in contrast with  
500 the simulation results (Figure 1B). The lower correlations of PPI terms from empirical data compared  
501 with the simulations imply that there might be some uncountable variations introduced during the  
502 deconvolution/convolution of real fMRI data. Indeed, deconvolution is rather a practical problem to  
503 recover underlying signals from some recorded measures, than a simple mathematical problem as  
504 depicted in equation 2. In the practical context, measurement noises need to be taken into account in the  
505 deconvolution model. For fMRI, the goal of deconvolution is to recover neuronal activities from  
506 observed BOLD signals, where there are plenty of noises during MRI recording. The deconvolution  
507 should be expressed as follows with an additional error term:

$$508 \quad x_{Physio} = z_{Physio} * hrf + \varepsilon \quad (5)$$

509 In this circumstance, some noises would be removed during deconvolution so that a signal deconvolved  
510 and convolved back with a HRF will no longer be the same as the original signal. The noise

511 characteristics and regularization methods for recovering  $z_{Physio}$  become critical to the success of  
512 deconvolution.

513 As have been shown in Figure 13, SPM's deconvolution method explicitly suppresses high  
514 frequency components with the intention that the hemodynamic response is slow therefore high frequency  
515 components may represent noises. But this may overly smooth the data, and remove useful information  
516 in higher frequency bands, thus making PPI results with the deconvolution method less sensitive than  
517 those with the direct PPI method. This problem may be more severe for short TR data, because there are  
518 more high frequency components in the data. On the other hand, high frequency signals in BOLD have  
519 been increasingly recognized as functionally meaningful (Chen and Glover, 2015; Gohel and Biswal,  
520 2015; Lewis et al., 2016), and high frequency components may be critical for connectivity dynamics.  
521 Given that multiband imaging technique has made fMRI sampling rate much faster, proper treatment of  
522 high frequency signals may be critical in deconvolution of fMRI signals and connectivity analysis in  
523 general.

524 Given the facts that the two PPI methods can generate similar results for the current block-  
525 designed task and the non-deconvolution method may increase statistical power, we lean toward a  
526 conclusion that the non-deconvolution PPI method may be a better choice for a block-designed task. This  
527 is in line with the recommendation by FSL (O'Reilly et al., 2012). Of course, deconvolution is still  
528 necessary for an event-related task design, because the PPI terms calculated from the convolution then  
529 multiplication method are dramatically different from those calculated from the multiplication then  
530 convolution method (Figure 1). It's also worth mentioning that it has been suggested that the beta series  
531 method (Rissman et al., 2004) might be an alternative method for event-related designed data (Cisler et al.,  
532 2014). Lastly, there are indeed many variety of deconvolution methods (Havlicek et al., 2011; Makni et  
533 al., 2008; Wu et al., 2013), and some of the methods may be more suitable for fMRI signals and PPI  
534 analysis. But systematic analyses comparing these different methods are needed in the future.

535           The current analyses are mostly based on empirical fMRI data. One limitation of empirical  
536 analysis is that there is no known ground truth to compare with. Simulation may be an alternative way to  
537 approach the question. However, development of biological realistic models for task modulated  
538 connectivity is still challenging, so that the deconvolution problem is difficult to study using simulations  
539 at the current stage. In addition, the similarities and differences between PPI results of the deconvolution  
540 and non-deconvolution methods depend on the variability of hemodynamic response in real fMRI data,  
541 which cannot be simply derived from simulations. Therefore, we believe that the current empirical  
542 analysis is suitable for the question of deconvolution.

#### 543 **4.4. Practical implications on PPI analysis**

544 The current study analyzed data from a simple task design with one task condition and one baseline  
545 condition. In real fMRI experiments, however, there are usually more than two conditions. To deal with  
546 multiple conditions, it was recommended that each task condition is modeled separately with respect to all  
547 other conditions (McLaren et al., 2012). In such “generalized PPI” framework, each experimental  
548 condition is modeled as the same way as the checkerboard condition in the current study. It is reasonable  
549 to say that the similarities of PPI results with and without deconvolution could be generalized to  
550 experiments with more than two conditions.

551           Task related functional connectivity as measured by PPI analysis is typically much smaller, in  
552 terms of effect size, reproducibility, and reliability, than simple task activations. To ensure enough  
553 statistical power and reliability, a larger sample size than typical activation studies and enough scan  
554 length for each subject are required. The design for an fMRI task needs to consider scan length as a  
555 critical factor, if the goal of the study is to examine task related connectivity. To date, it is still largely  
556 unknown how long the scan is needed for reliability capture task related connectivity. We can only get  
557 some insight from resting-state connectivity research, where large scale test-retest datasets are available  
558 (Biswal et al., 2010; Zuo et al., 2014). In resting-state literature, it has been suggested that at least five  
559 minutes of scan is needed for reliability estimate functional connectivity (Birn et al., 2013; Van Dijk et al.,

560 2010). Then at least five minutes of scan length for a single task condition is needed for task based fMRI.  
561 If the PPI effects are going to be compared between two experimental conditions, which is usually the  
562 case for a well-designed cognitive neuroimaging study, the required scan length would be much longer.  
563 Of course, direct examinations of the effect of scan length on task related connectivity estimates are still  
564 needed in future research.

565         Secondly, the PPI method tasks advantages of the dynamic aspect of the BOLD signals.  
566 Therefore, it's preferable to adopt faster sampling rate to capture temporal dynamics, which may in turn  
567 lead to sacrifice of other aspects of signals, e.g. spatial resolution. The current results support the idea  
568 that shorter TR may be beneficial for PPI analysis. Of course, faster sampling rate could be accomplished  
569 by new developments of MRI techniques such as multi-band acquisition (Feinberg and Yacoub, 2012).  
570 However, the current results also suggested some pitfalls of using short TR data. The currently used HRF  
571 models and deconvolution method may be not quite suitable for fast TR data, so that the PPI method with  
572 deconvolution may fail in some cases in short TR data. More work is still needed to validate and  
573 optimize models on high speed fMRI data. Of course, high spatial resolution has its own advantage on  
574 mapping small brain structures such as the thalamus. So that the considerations of temporal and spatial  
575 resolutions may also need to take into account the spatial scales of regions of interest.

576

## 577 **5. Conclusion**

578 We demonstrated that the deconvolution and non-deconvolution PPI methods generated similar results on  
579 a simple block-designed task. The deconvolution method may be beneficial in terms of statistical power  
580 and reproducibility. Taken together, deconvolution may be not necessary for PPI analysis for block-  
581 designed fMRI data. When using a large sample, group mean PPI effects are reproducible; however,  
582 inter-subject reliabilities of the PPI effects are quite limited. Systematic evaluations on scan length and  
583 reliability may be necessary before studying inter-subject differences or group differences of PPI effects.

584

585

586 **Acknowledgement**

587 This research was supported by National Institute of Health grants R01 AG032088 and R01 DA038895.

588

589

590 **Reference**

591 Amunts, K., Malikovic, A., Mohlberg, H., Schormann, T., Zilles, K., 2000. Brodmann's Areas 17 and 18  
592 Brought into Stereotaxic Space—Where and How Variable? *Neuroimage* 11, 66–84.

593 doi:10.1006/nimg.1999.0516

594 Birn, R.M., Molloy, E.K., Patriat, R., Parker, T., Meier, T.B., Kirk, G.R., Nair, V.A., Meyerand, M.E.,  
595 Prabhakaran, V., 2013. The effect of scan length on the reliability of resting-state fMRI connectivity  
596 estimates. *Neuroimage* 83, 550–558. doi:10.1016/j.neuroimage.2013.05.099

597 Biswal, B.B., Mennes, M., Zuo, X.-N., Gohel, S., Kelly, C., Smith, S.M., Beckmann, C.F., Adelstein, J.S.,  
598 Buckner, R.L., Colcombe, S., Dogonowski, A.-M., Ernst, M., Fair, D., Hampson, M., Hoptman,  
599 M.J., Hyde, J.S., Kiviniemi, V.J., Kötter, R., Li, S.-J., Lin, C.-P., Lowe, M.J., Mackay, C., Madden,  
600 D.J., Madsen, K.H., Margulies, D.S., Mayberg, H.S., McMahon, K., Monk, C.S., Mostofsky, S.H.,  
601 Nagel, B.J., Pekar, J.J., Peltier, S.J., Petersen, S.E., Riedl, V., Rombouts, S.A.R.B., Rypma, B.,  
602 Schlaggar, B.L., Schmidt, S., Seidler, R.D., Siegle, G.J., Sorg, C., Teng, G.-J., Vejjola, J., Villringer,  
603 A., Walter, M., Wang, L., Weng, X.-C., Whitfield-Gabrieli, S., Williamson, P., Windischberger, C.,  
604 Zang, Y.-F., Zhang, H.-Y., Castellanos, F.X., Milham, M.P., 2010. Toward discovery science of  
605 human brain function. *Proc. Natl. Acad. Sci. U. S. A.* 107, 4734–9. doi:10.1073/pnas.0911855107

606 Caspers, J., Zilles, K., Amunts, K., Laird, A.R., Fox, P.T., Eickhoff, S.B., 2014. Functional  
607 characterization and differential coactivation patterns of two cytoarchitectonic visual areas on the  
608 human posterior fusiform gyrus. *Hum. Brain Mapp.* 35, 2754–2767. doi:10.1002/hbm.22364

609 Caspers, J., Zilles, K., Eickhoff, S.B., Schleicher, A., Mohlberg, H., Amunts, K., 2013.

- 610 Cytoarchitectonical analysis and probabilistic mapping of two extrastriate areas of the human  
611 posterior fusiform gyrus. *Brain Struct. Funct.* 218, 511–526. doi:10.1007/s00429-012-0411-8
- 612 Chen, J.E., Glover, G.H., 2015. BOLD fractional contribution to resting-state functional connectivity  
613 above 0.1Hz. *Neuroimage* 107, 207–218. doi:10.1016/j.neuroimage.2014.12.012
- 614 Cisler, J.M., Bush, K., Steele, J.S., 2014. A comparison of statistical methods for detecting context-  
615 modulated functional connectivity in fMRI. *Neuroimage* 84, 1042–1052.  
616 doi:10.1016/j.neuroimage.2013.09.018
- 617 Di, X., Biswal, B.B., 2015. Characterizations of resting-state modulatory interactions in the human brain.  
618 *J. Neurophysiol.* 114, 2785–96. doi:10.1152/jn.00893.2014
- 619 Di, X., Fu, Z., Chan, S.C., Hung, Y.S., Biswal, B.B., Zhang, Z., 2015. Task-related functional  
620 connectivity dynamics in a block-designed visual experiment. *Front. Hum. Neurosci.* 9, 1–11.  
621 doi:10.3389/fnhum.2015.00543
- 622 Di, X., Huang, J., Biswal, B.B., 2017a. Task modulated brain connectivity of the amygdala: a meta-  
623 analysis of psychophysiological interactions. *Brain Struct. Funct.* 222, 619–634.  
624 doi:10.1007/s00429-016-1239-4
- 625 Di, X., Reynolds, R.C., Biswal, B.B., 2017b. Imperfect (de)convolution may introduce spurious  
626 psychophysiological interactions and how to avoid it. *Hum. Brain Mapp.* 38, 1723–1740.  
627 doi:10.1002/hbm.23413
- 628 Dubois, J., Adolphs, R., 2016. Building a Science of Individual Differences from fMRI. *Trends Cogn. Sci.*  
629 20, 425–443. doi:10.1016/j.tics.2016.03.014
- 630 Feinberg, D.A., Yacoub, E., 2012. The rapid development of high speed, resolution and precision in fMRI.  
631 *Neuroimage* 62, 720–725. doi:10.1016/j.neuroimage.2012.01.049
- 632 Friston, K.J., Buechel, C., Fink, G.R., Morris, J., Rolls, E., Dolan, R.J., 1997. Psychophysiological and  
633 modulatory interactions in neuroimaging. *Neuroimage* 6, 218–29.
- 634 Friston, K.J., Harrison, L., Penny, W., 2003. Dynamic causal modelling. *Neuroimage* 19, 1273–1302.

- 635           doi:10.1016/S1053-8119(03)00202-7
- 636   Friston, K.J., Williams, S., Howard, R., Frackowiak, R.S., Turner, R., 1996. Movement-related effects in  
637           fMRI time-series. *Magn. Reson. Med.* 35, 346–55. doi:DOI 10.1002/mrm.1910350312
- 638   Gitelman, D.R., Penny, W.D., Ashburner, J., Friston, K.J., 2003. Modeling regional and  
639           psychophysiologic interactions in fMRI: the importance of hemodynamic deconvolution.  
640           *Neuroimage* 19, 200–7.
- 641   Gohel, S.R., Biswal, B.B., 2015. Functional Integration Between Brain Regions at Rest Occurs in  
642           Multiple-Frequency Bands. *Brain Connect.* 5, 23–34. doi:10.1089/brain.2013.0210
- 643   Guillery, R.W., Sherman, S.M., 2002. Thalamic Relay Functions and Their Role in Corticocortical  
644           Communication. *Neuron* 33, 163–175.
- 645   Guo, C.C., Kurth, F., Zhou, J., Mayer, E.A., Eickhoff, S.B., Kramer, J.H., Seeley, W.W., 2012. One-year  
646           test–retest reliability of intrinsic connectivity network fMRI in older adults. *Neuroimage* 61, 1471–  
647           1483. doi:10.1016/j.neuroimage.2012.03.027
- 648   Handwerker, D.A., Ollinger, J.M., D’Esposito, M., 2004. Variation of BOLD hemodynamic responses  
649           across subjects and brain regions and their effects on statistical analyses. *Neuroimage* 21, 1639–  
650           1651. doi:10.1016/j.neuroimage.2003.11.029
- 651   Havlicek, M., Friston, K.J., Jan, J., Brazdil, M., Calhoun, V.D., 2011. Dynamic modeling of neuronal  
652           responses in fMRI using cubature Kalman filtering. *Neuroimage* 56, 2109–2128.  
653           doi:10.1016/j.neuroimage.2011.03.005
- 654   Jenkinson, M., Beckmann, C.F., Behrens, T.E.J., Woolrich, M.W., Smith, S.M., 2012. FSL. *Neuroimage*.  
655           doi:10.1016/j.neuroimage.2011.09.015
- 656   Kujovic, M., Zilles, K., Malikovic, A., Schleicher, A., Mohlberg, H., Rottschy, C., Eickhoff, S.B.,  
657           Amunts, K., 2013. Cytoarchitectonic mapping of the human dorsal extrastriate cortex. *Brain Struct.*  
658           *Funct.* 218, 157–172. doi:10.1007/s00429-012-0390-9
- 659   Lewis, L.D., Setsompop, K., Rosen, B.R., Polimeni, J.R., 2016. Fast fMRI can detect oscillatory neural



660 activity in humans. *Proc. Natl. Acad. Sci.* 201608117. doi:10.1073/pnas.1608117113

661 Makni, S., Beckmann, C., Smith, S., Woolrich, M., 2008. Bayesian deconvolution fMRI data using  
662 bilinear dynamical systems. *Neuroimage* 42, 1381–1396. doi:10.1016/j.neuroimage.2008.05.052

663 Malikovic, A., Amunts, K., Schleicher, A., Mohlberg, H., Eickhoff, S.B., Wilms, M., Palomero-Gallagher,  
664 N., Armstrong, E., Zilles, K., 2006. Cytoarchitectonic Analysis of the Human Extrastriate Cortex in  
665 the Region of V5/MT+: A Probabilistic, Stereotaxic Map of Area hOc5. *Cereb. Cortex* 17, 562–574.  
666 doi:10.1093/cercor/bhj181

667 McLaren, D.G., Ries, M.L., Xu, G., Johnson, S.C., 2012. A generalized form of context-dependent  
668 psychophysiological interactions (gPPI): A comparison to standard approaches. *Neuroimage* 61,  
669 1277–1286. doi:10.1016/j.neuroimage.2012.03.068

670 Nooner, K.B., Colcombe, S.J., Tobe, R.H., Mennes, M., Benedict, M.M., Moreno, A.L., Panek, L.J.,  
671 Brown, S., Zavitz, S.T., Li, Q., Sikka, S., Gutman, D., Bangaru, S., Schlachter, R.T., Kamiel, S.M.,  
672 Anwar, A.R., Hinz, C.M., Kaplan, M.S., Rachlin, A.B., Adelsberg, S., Cheung, B., Khanuja, R., Yan,  
673 C., Craddock, C.C., Calhoun, V., Courtney, W., King, M., Wood, D., Cox, C.L., Kelly, A.M.C., Di  
674 Martino, A., Petkova, E., Reiss, P.T., Duan, N., Thomsen, D., Biswal, B., Coffey, B., Hoptman, M.J.,  
675 Javitt, D.C., Pomara, N., Sidtis, J.J., Koplewicz, H.S., Castellanos, F.X., Leventhal, B.L., Milham,  
676 M.P., 2012. The NKI-Rockland Sample: A Model for Accelerating the Pace of Discovery Science in  
677 Psychiatry. *Front. Neurosci.* 6, 152. doi:10.3389/fnins.2012.00152

678 O'Reilly, J.X., Woolrich, M.W., Behrens, T.E.J., Smith, S.M., Johansen-Berg, H., 2012. Tools of the  
679 Trade: Psychophysiological Interactions and Functional Connectivity. *Soc. Cogn. Affect. Neurosci.*  
680 nss055-. doi:10.1093/scan/nss055

681 Plichta, M.M., Schwarz, A.J., Grimm, O., Morgen, K., Mier, D., Haddad, L., Gerdes, A.B.M., Sauer, C.,  
682 Tost, H., Esslinger, C., Colman, P., Wilson, F., Kirsch, P., Meyer-Lindenberg, A., 2012. Test–retest  
683 reliability of evoked BOLD signals from a cognitive–emotive fMRI test battery. *Neuroimage* 60,  
684 1746–1758. doi:10.1016/j.neuroimage.2012.01.129

- 685 Raemaekers, M., Vink, M., Zandbelt, B., van Wezel, R.J.A., Kahn, R.S., Ramsey, N.F., 2007. Test–retest  
686 reliability of fMRI activation during prosaccades and antisaccades. *Neuroimage* 36, 532–542.  
687 doi:10.1016/j.neuroimage.2007.03.061
- 688 Rissman, J., Gazzaley, A., D’Esposito, M., 2004. Measuring functional connectivity during distinct stages  
689 of a cognitive task. *Neuroimage* 23, 752–63. doi:10.1016/j.neuroimage.2004.06.035
- 690 Roebroeck, A., Formisano, E., Goebel, R., 2011. The identification of interacting networks in the brain  
691 using fMRI: Model selection, causality and deconvolution. *Neuroimage* 58, 296–302.  
692 doi:10.1016/j.neuroimage.2009.09.036
- 693 Rombouts, S. a, Barkhof, F., Hoogenraad, F.G., Sprenger, M., Scheltens, P., 1998. Within-subject  
694 reproducibility of visual activation patterns with functional magnetic resonance imaging using  
695 multislice echo planar imaging. *Magn. Reson. Imaging* 16, 105–113.
- 696 Rottschy, C., Eickhoff, S.B., Schleicher, A., Mohlberg, H., Kujovic, M., Zilles, K., Amunts, K., 2007.  
697 Ventral visual cortex in humans: Cytoarchitectonic mapping of two extrastriate areas. *Hum. Brain*  
698 *Mapp.* 28, 1045–1059. doi:10.1002/hbm.20348
- 699 Saalman, Y.B., Kastner, S., 2011. Cognitive and Perceptual Functions of the Visual Thalamus. *Neuron*  
700 71, 209–223. doi:10.1016/j.neuron.2011.06.027
- 701 Taylor, P.A., Gohel, S., Di, X., Walter, M., Biswal, B.B., 2012. Functional covariance networks:  
702 obtaining resting-state networks from intersubject variability. *Brain Connect.* 2, 203–17.  
703 doi:10.1089/brain.2012.0095
- 704 Van Dijk, K.R.A., Hedden, T., Venkataraman, A., Evans, K.C., Lazar, S.W., Buckner, R.L., 2010.  
705 Intrinsic functional connectivity as a tool for human connectomics: theory, properties, and  
706 optimization. *J. Neurophysiol.* 103, 297–321. doi:10.1152/jn.00783.2009
- 707 Vul, E., Harris, C., Winkielman, P., Pashler, H., 2009. Puzzlingly High Correlations in fMRI Studies of  
708 Emotion, Personality, and Social Cognition. *Perspect. Psychol. Sci.* 4, 274–290. doi:10.1111/j.1745-  
709 6924.2009.01125.x

- 710 Wu, G.-R., Liao, W., Stramaglia, S., Ding, J.-R., Chen, H., Marinazzo, D., 2013. A blind deconvolution  
711 approach to recover effective connectivity brain networks from resting state fMRI data. *Med. Image*  
712 *Anal.* 17, 365–74. doi:10.1016/j.media.2013.01.003
- 713 Yuan, R., Di, X., Taylor, P.A., Gohel, S., Tsai, Y.-H., Biswal, B.B., 2016. Functional topography of the  
714 thalamocortical system in human. *Brain Struct. Funct.* 221, 1971–1984. doi:10.1007/s00429-015-  
715 1018-7
- 716 Zuo, X.-N., Anderson, J.S., Bellec, P., Birn, R.M., Biswal, B.B., Blautzik, J., Breitner, J.C., Buckner,  
717 R.L., Calhoun, V.D., Castellanos, F.X., Chen, A., Chen, B., Chen, J., Chen, X., Colcombe, S.J.,  
718 Courtney, W., Craddock, R.C., Di Martino, A., Dong, H.-M., Fu, X., Gong, Q., Gorgolewski, K.J.,  
719 Han, Y., He, Y., He, Y., Ho, E., Holmes, A., Hou, X.-H., Huckins, J., Jiang, T., Jiang, Y., Kelley,  
720 W., Kelly, C., King, M., LaConte, S.M., Lainhart, J.E., Lei, X., Li, H.-J., Li, K., Li, K., Lin, Q., Liu,  
721 D., Liu, J., Liu, X., Liu, Y., Lu, G., Lu, J., Luna, B., Luo, J., Lurie, D., Mao, Y., Margulies, D.S.,  
722 Mayer, A.R., Meindl, T., Meyerand, M.E., Nan, W., Nielsen, J.A., O'Connor, D., Paulsen, D.,  
723 Prabhakaran, V., Qi, Z., Qiu, J., Shao, C., Shehzad, Z., Tang, W., Villringer, A., Wang, H., Wang,  
724 K., Wei, D., Wei, G.-X., Weng, X.-C., Wu, X., Xu, T., Yang, N., Yang, Z., Zang, Y.-F., Zhang, L.,  
725 Zhang, Q., Zhang, Z., Zhang, Z., Zhao, K., Zhen, Z., Zhou, Y., Zhu, X.-T., Milham, M.P., 2014. An  
726 open science resource for establishing reliability and reproducibility in functional connectomics. *Sci.*  
727 *Data* 1, 140049. doi:10.1038/sdata.2014.49
- 728 Zuo, X.-N., Di Martino, A., Kelly, C., Shehzad, Z.E., Gee, D.G., Klein, D.F., Castellanos, F.X., Biswal,  
729 B.B., Milham, M.P., 2010a. The oscillating brain: Complex and reliable. *Neuroimage* 49, 1432–  
730 1445. doi:10.1016/j.neuroimage.2009.09.037
- 731 Zuo, X.-N., Kelly, C., Adelstein, J.S., Klein, D.F., Castellanos, F.X., Milham, M.P., 2010b. Reliable  
732 intrinsic connectivity networks: Test–retest evaluation using ICA and dual regression approach.  
733 *Neuroimage* 49, 2163–2177. doi:10.1016/j.neuroimage.2009.10.080
- 734

735 **Figure legend**

736 **Figure 1** Simulations of the correlations between PPI terms calculated from deconvolution and non-  
737 deconvolution methods. Panel A illustrates different task designs that were used for the simulation. Each  
738 column represents a task design. E in the x axis represents the event-related design, with 1 time bin (2 s)  
739 of trial condition and 5 time bins (10 s) of baseline condition. The remaining columns show block  
740 designs with different frequencies of repetition. For example, 80 secs cycle means 40-s on and 40-s off of  
741 the task condition related to the baseline. Physiological variables at the neuronal level were generated  
742 using Gaussian random variables for 1,000 times. Panel B shows boxplots of correlations across the  
743 1,000 simulations between PPI terms calculated from two methods: 1) the two simulated variables were  
744 convolved with the HRF and then multiplied to form the PPI term; 2) the two simulated variables were  
745 multiplied and then convolved with the HRF.

746

747 **Figure 2** Examples of PPI terms calculated by the deconvolution and non-deconvolution methods for the  
748 two TR runs.

749

750 **Figure 3** A) Activations (*t* maps) of visual checkerboard presentation for the 645 ms TR run (upper) and  
751 1400 ms TR run (lower). The threshold *t* value corresponds to one-tailed significance at  $p < 0.001$ . B)  
752 Overlaps (Dice coefficients) between the two TR runs using *t* threshold (left) and percentile threshold  
753 (right). C) Test-retest reliability map (intraclass correlations, ICC) of activations between the two runs is  
754 shown on the left, which were thresholded at  $ICC > 0.2$ . The histograms of ICC of activations between  
755 the two TR runs in significant voxels and whole brain are shown on the right. The significant voxels  
756 were determined using intersection of the two runs each thresholded at  $p < 0.001$ .

757

758 **Figure 4** Psychophysiological interaction (PPI) results for the left middle occipital gyrus (LMOG) seed  
759 during checkerboard presentation in the two TR (repetition time) runs of 645 ms and TR 1400 ms. The

760 resulting clusters were thresholded at  $p < 0.001$  (approximated  $t = 3.15$ ), with DF (degree of freedom) of  
761 137. The last row illustrates the number of overlapped negative PPI results in the four scenarios.  
762 Numbers on the bottom represent z coordinates in MNI (Montreal Neurology Institute) space.

763

764 **Figure 5** Psychophysiological interaction (PPI) results for the right middle occipital gyrus (RMOG) seed  
765 during checkerboard presentation in the two TR (repetition time) runs of 645 ms and TR 1400 ms. The  
766 resulting clusters were thresholded at  $p < 0.001$  (approximated  $t = 3.15$ ), with DF (degree of freedom) of  
767 137. The last row illustrates the number of overlapped negative PPI results in the four scenarios.  
768 Numbers on the bottom represent z coordinates in MNI (Montreal Neurology Institute) space.

769

770 **Figure 6** Psychophysiological interaction (PPI) results for the thalamus seed during checkerboard  
771 presentation in the TR (repetition time) run of 645 ms. There is no significant PPI effects of the thalamus  
772 seed in TR run of 1400 ms. The resulting clusters were thresholded at  $p < 0.001$  (approximated  $t = 3.15$ ),  
773 with DF (degree of freedom) of 137. Numbers on the bottom represent z coordinates in MNI (Montreal  
774 Neurology Institute) space.

775

776 **Figure 7** Matrices of psychophysiological interaction (PPI) results among the 20 regions of interest of  
777 visual thalamus and visual cortex for the two TR (repetition time) runs and two methods. The resulting  
778 clusters were thresholded at  $p < 0.001$ .

779

780 **Figure 8** Illustration of consistently reduced connectivity during checkerboard presentation compared  
781 with fixation in the ROI-based (region of interest) psychophysiological interaction (PPI) analysis in the  
782 two TR (repetition time) runs and two methods. Numbers on the bottom represent z coordinates in MNI  
783 (Montreal Neurology Institute) space.

784

785 **Figure 9** Dice coefficients of thresholded negative PPI effects between the two TR runs as functions of t  
786 threshold (A) and percentile threshold (B) for the two seeds and two PPI methods. The lowest t used for  
787 calculating overlap is 1.7, which approximately corresponds to  $p < 0.05$ . The largest percentile is 80 to  
788 99.9 percentile, which is approximately corresponds to the largest proportions of voxels at  $p < 0.05$ .

789

790 **Figure 10** Histograms (normalized) of intraclass correlations of PPI effects between the two TR runs  
791 across the whole brain (gray lines) and in statistically significant voxels (red lines). The significant  
792 voxels were determined using intersection of the two runs and two methods each thresholded at  $p < 0.01$ .  
793 Left and right masks were calculated separately.

794

795 **Figure 11** Mean, standard deviation, and coefficient of variation in the 27 regions of interest that showed  
796 significant negative PPI effects in the voxel-wise analysis of the left middle occipital gyrus (LMOG) (top  
797 row) and right middle occipital gyrus (RMOG) (bottom row) seeds. 1, 2, 3, and 4 of the x axes represent  
798 the four different scenarios with two PPI methods and two TR runs.

799

800 **Figure 12** A) Histograms of correlations between PPI terms with and without deconvolution across all  
801 subjects from both the LMOG and RMOG ROIs for the two TR runs. B) For the worst case as spotted by  
802 the black arrow in A), we show the raw time series and the time series with deconvolution and re-  
803 convolution with hemodynamic response function.

804

805 **Figure 13** Power spectrums of time series from the right middle occipital gyrus seed for each of the 138  
806 subjects for the 645 ms run (upper panels) and 1400 ms run (lower panels). Each line in a plot represents  
807 one subject. Left, middle, and right panels show the power spectrum of the raw, deconvolved, and re-  
808 convolved time series, respectively.

809
